# Supplementary figures and images for: Impact of Early Intervention on Psychopathology, Crime, and Well-Being at Age 25
Source: Atypon-hosted journal article supplement (doi:10.1176/appi.ajp.2014.13060786), 2014-12-17

CONSORT Flow Chart

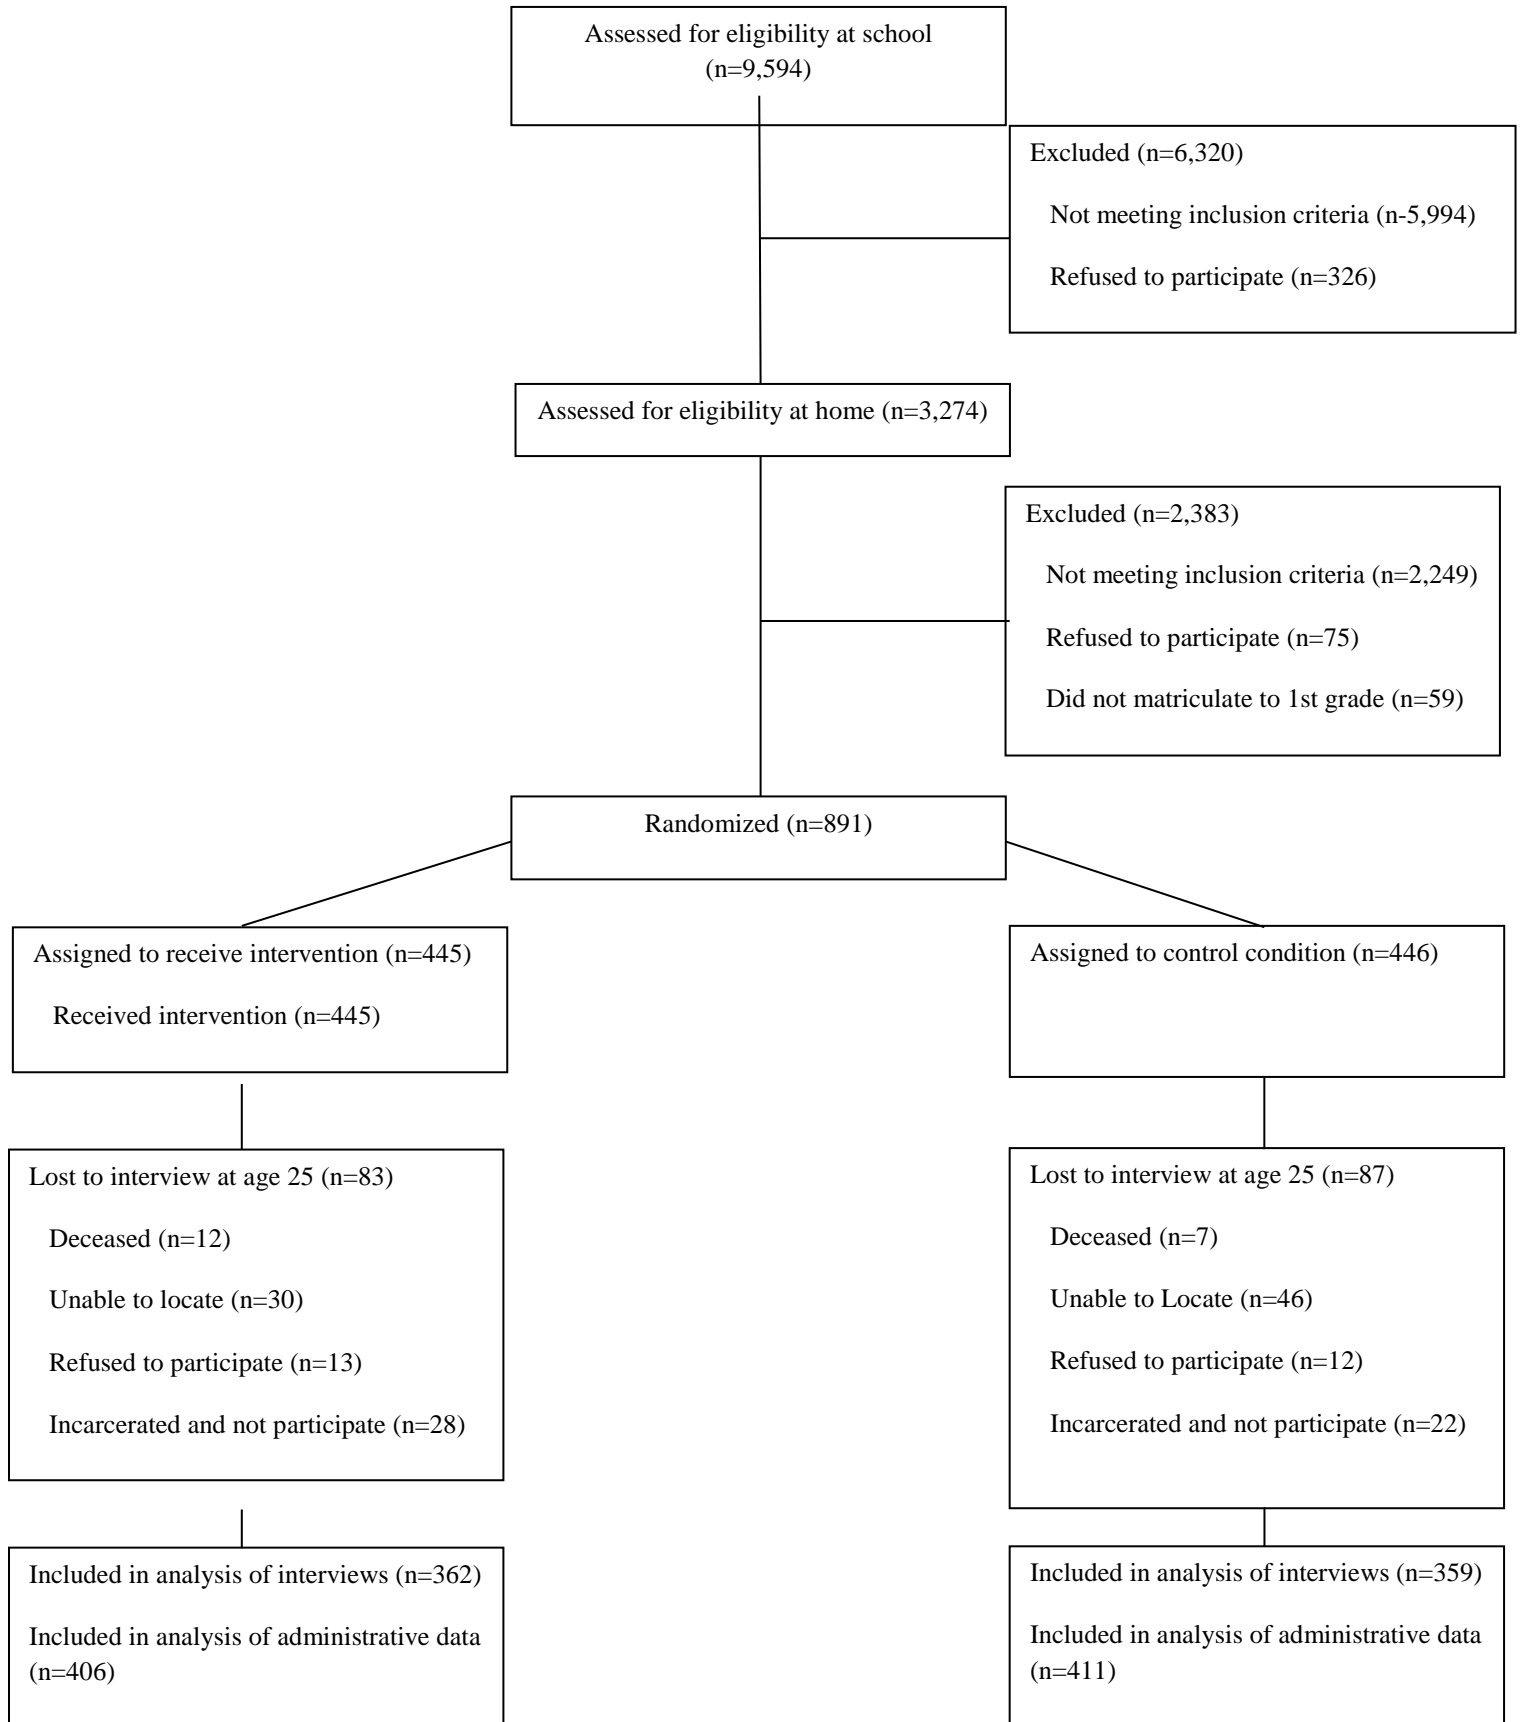

Supplement: appi.ajp.2014.13060786.ds001.pdf [file appi.ajp.2014.13060786.ds001.pdf]
